# Supplementary material
Source: publisher figshare collection journal article supplement (https://gsapubs.figshare.com/articles/dataset/_/12501191)
Supplement: Supplementary file 1 [file 1]

Metzger, J.G., Ramezani, J., Bowring, S.A., and Fike, D.A., 2020, New age constraints on the duration and origin of the Late Ordovician Guttenberg  $\delta^{13}\text{C}_{\text{carb}}$  excursion from high-precision U-Pb geochronology of K-bentonites: GSA Bulletin, <https://doi.org/10.1130/B31920.1>.

## Supplemental Material

**Table S1.** U-Pb data for analyzed zircons from Ordovician K-bentonites, Missouri, USA
